# Supplementary material for: The value of non-invasive prenatal testing: preferences of Canadian pregnant women, their partners, and health professionals regarding NIPT use and access
Source: Springer Nature journal article supplement (doi:10.1186/s12884-018-2153-y), 2019-01-10
Supplement: MOESM1 [file 16390320]

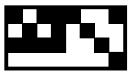

21746

ANNN

Survey nombre (women):

|  |  |  |  |
|--|--|--|--|
|  |  |  |  |
|--|--|--|--|

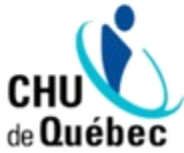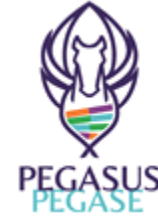

## SURVEY FOR PREGNANT WOMEN

***Please read the following before completing the survey:***

### STUDY DESCRIPTION

NIPT (Non-Invasive Prenatal Testing) is a new technology that tests the risk for Down syndrome and some other conditions. The purpose of this survey is to learn what pregnant women and their partners know about NIPT and to learn about their views regarding its use. This survey is part of a larger study on NIPT, called PEGASUS, see: <http://pegasus-pegase.ca/>.

### BENEFITS AND RISKS

Participating in the study will not provide you with any immediate or specific benefit, but it will allow you to contribute to the advancement of knowledge about NIPT and this may help other women who use this test in the future. The survey does not pose any risk and its results will be kept confidential. You are free to withdraw from this study at any time.

### CONSENT

By completing and returning this survey, you consent to participate in this part of the PEGASUS study and authorize Dr. Vardit Ravitsky and her colleagues to analyze the content of the completed survey. Completing this survey can take about 20 minutes.

### CONFIDENTIALITY

This survey is coded and you do not have to sign your name on it. All information obtained in connection with this survey will be kept confidential. Access to this survey will be restricted to the members of the research team, for the duration of the study. The surveys will be kept in a secure place, under lock and key, for a maximum of 10 years after the project ends. The results of the study may be published, but no identifiable information will ever be disclosed.

### CONTACT PERSONS

For further information regarding this project, you are welcome at any time to contact Dr. Vardit Ravitsky at (514) 343-6111 extension 3375 or at [vardit.ravitsky@umontreal.ca](mailto:vardit.ravitsky@umontreal.ca).

### INSTRUCTIONS

***Please answer directly on the survey. If you change your mind, cross out your first mark. When you are finished, please seal it in the attached envelope and hand it in or return it in the pre-addressed envelope.***

***If you have a partner that might agree to participate in this study, please request a survey for your partner. Your partner's survey can be turned in if completed here, or returned by mail if completed at a later time.***

***If you prefer to complete this survey online, you can find it at: <http://nipt.hostedincanadasurveys.ca/s1>***

*We thank you for participating.*

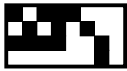

21746

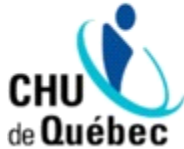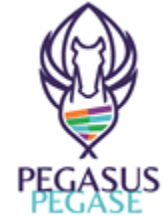**PART 1: WHAT DO YOU KNOW ABOUT DOWN SYNDROME (DS)?**1. **Before** today, have you ever heard of:**(PLEASE CHECK ONE ANSWER FOR EACH STATEMENT)**

|    |                                      | Yes                      | No                       |
|----|--------------------------------------|--------------------------|--------------------------|
| a. | Down syndrome                        | <input type="checkbox"/> | <input type="checkbox"/> |
| b. | Trisomy 21                           | <input type="checkbox"/> | <input type="checkbox"/> |
| c. | Prenatal screening for Down syndrome | <input type="checkbox"/> | <input type="checkbox"/> |
| d. | Noninvasive prenatal testing (NIPT)  | <input type="checkbox"/> | <input type="checkbox"/> |
| e. | Amniocentesis                        | <input type="checkbox"/> | <input type="checkbox"/> |

2. The next question is about Down syndrome (DS). Do you think these statements are true or false?

**(PLEASE CHECK ONE ANSWER FOR EACH STATEMENT)**

|    |                                                                                          | True                     | False                    |
|----|------------------------------------------------------------------------------------------|--------------------------|--------------------------|
| a. | Other people can tell when a child has DS                                                | <input type="checkbox"/> | <input type="checkbox"/> |
| b. | All individuals with DS have some kind of intellectual disability                        | <input type="checkbox"/> | <input type="checkbox"/> |
| c. | People with DS can live until at least their 50's-60's                                   | <input type="checkbox"/> | <input type="checkbox"/> |
| d. | Intellectual disability is the only health issue related to DS                           | <input type="checkbox"/> | <input type="checkbox"/> |
| e. | DS can be caused by a woman's unhealthy lifestyle                                        | <input type="checkbox"/> | <input type="checkbox"/> |
| f. | A woman has a risk of having a baby with DS <b>only if</b> somebody in her family has DS | <input type="checkbox"/> | <input type="checkbox"/> |

3. The next question is about the different options available to pregnant women who want to know more about the risk of Down syndrome (DS) for their pregnancy. Do you think these statements are true or false?

**(PLEASE CHECK ONE ANSWER FOR EACH STATEMENT)**

|    |                                                                                     | True                     | False                    |
|----|-------------------------------------------------------------------------------------|--------------------------|--------------------------|
| a. | All babies with DS show signs of DS on ultrasound                                   | <input type="checkbox"/> | <input type="checkbox"/> |
| b. | Current screening can be used to diagnose with certainty a baby with DS             | <input type="checkbox"/> | <input type="checkbox"/> |
| c. | Amniocentesis can be used to diagnose with certainty a baby with DS                 | <input type="checkbox"/> | <input type="checkbox"/> |
| d. | NIPT can be used to diagnose with certainty a baby with DS                          | <input type="checkbox"/> | <input type="checkbox"/> |
| e. | Amniocentesis can predict the severity of the symptoms of DS                        | <input type="checkbox"/> | <input type="checkbox"/> |
| f. | There is an increased risk of miscarriage (losing the pregnancy) with amniocentesis | <input type="checkbox"/> | <input type="checkbox"/> |
| g. | There is no increased risk of miscarriage (losing the pregnancy) with NIPT          | <input type="checkbox"/> | <input type="checkbox"/> |

## INFORMATIONAL SHEET

Down syndrome (DS) is a genetic condition caused by the presence of an extra chromosome 21 (also called 'trisomy 21') which affects 1 in 770 newborns. Individuals with DS usually share physical features that are characteristic of DS. All have some degree of intellectual disability, which varies from person to person; their development is slower than other kids, but they will eventually learn to walk, talk, and dress themselves. Most children attend their neighborhood schools, some in regular classes and others in special education classes. Some children have more significant needs and require a more specialized program. Many adults with DS are capable of working in the community, but some require a more structured environment. Many will also have other health problems (for example heart defects). 99% of cases of DS are not inherited from the parents; it usually occurs by chance.

There are ways to check during pregnancy if there is a possibility that the baby has DS:

|                                     | <b>MATERNAL SERUM SCREENING (MSS or 'current screening')</b>                                                                                                                                                                                                                                                                                                                                                                                                                                                                                                | <b>AMNIOCENTESIS</b>                                                                                                                                                                                                                                                                                                                                                                                                           | <b>NIPT</b>                                                                                                                                                                                                                                                                                                                                                                                                                                            |
|-------------------------------------|-------------------------------------------------------------------------------------------------------------------------------------------------------------------------------------------------------------------------------------------------------------------------------------------------------------------------------------------------------------------------------------------------------------------------------------------------------------------------------------------------------------------------------------------------------------|--------------------------------------------------------------------------------------------------------------------------------------------------------------------------------------------------------------------------------------------------------------------------------------------------------------------------------------------------------------------------------------------------------------------------------|--------------------------------------------------------------------------------------------------------------------------------------------------------------------------------------------------------------------------------------------------------------------------------------------------------------------------------------------------------------------------------------------------------------------------------------------------------|
| <b>Description of the procedure</b> | <ul style="list-style-type: none"> <li>Checks the <b>level of risk</b> for DS</li> <li>Measures the <b>level of hormones</b> produced by the baby or placenta that end up in the mother's blood</li> <li>Includes <b>one or two blood draws</b> from the mother</li> <li>Where available, an ultrasound is done early in the pregnancy to measure nuchal translucency (level of fluid at the nape of the baby's neck)</li> </ul>                                                                                                                            | <ul style="list-style-type: none"> <li>Medical procedure that can <b>confirm DS</b> during the pregnancy</li> <li>Allows checking the <b>number and appropriate structure of all chromosomes</b> in the baby's cells</li> <li>Requires <b>inserting a thin needle into the uterus</b> – through the mother's abdomen - to extract amniotic fluid (fluid in which the baby floats in the mother's womb)</li> </ul>              | <ul style="list-style-type: none"> <li>Checks the <b>level of risk</b> for DS</li> <li>Analyses the <b>baby's DNA</b> that is floating in the mother's blood</li> <li>Includes <b>one blood draw</b> from the mother</li> </ul>                                                                                                                                                                                                                        |
| <b>Timing: When in pregnancy</b>    | <ul style="list-style-type: none"> <li>1<sup>st</sup> blood draw: usually between the <b>10<sup>th</sup> and 13<sup>th</sup> week</b> of pregnancy</li> <li>2<sup>nd</sup> blood draw: usually between the <b>15<sup>h</sup> and 16<sup>th</sup> week</b> of pregnancy</li> <li>Results can be available between the <b>16<sup>th</sup> and 17<sup>th</sup> week</b> of pregnancy</li> </ul>                                                                                                                                                                | <ul style="list-style-type: none"> <li>Available from the <b>15<sup>th</sup> week</b> of pregnancy</li> <li>Results can be available between the <b>17<sup>th</sup> and 19<sup>th</sup> week</b> of pregnancy</li> </ul>                                                                                                                                                                                                       | <ul style="list-style-type: none"> <li>Available as of the <b>10<sup>th</sup> week</b> of pregnancy</li> <li>Results can be available between the <b>11<sup>th</sup>-12<sup>th</sup> week</b> of pregnancy</li> </ul>                                                                                                                                                                                                                                  |
| <b>Risk to pregnancy</b>            | <b>No increased risk of miscarriage</b>                                                                                                                                                                                                                                                                                                                                                                                                                                                                                                                     | <b>Risk of miscarriage</b> around 1 in 200 (0.5%)                                                                                                                                                                                                                                                                                                                                                                              | <b>No increased risk of miscarriage</b>                                                                                                                                                                                                                                                                                                                                                                                                                |
| <b>Accuracy</b>                     | Detects between 77% and 88% of DS cases (supported by a lot of evidence)                                                                                                                                                                                                                                                                                                                                                                                                                                                                                    | 100% accurate in detecting DS (supported by a lot of evidence)                                                                                                                                                                                                                                                                                                                                                                 | 98% accurate (or more) for DS in women who are considered "high risk" based on MSS (supported by some evidence)                                                                                                                                                                                                                                                                                                                                        |
| <b>Type of test</b>                 | Screening                                                                                                                                                                                                                                                                                                                                                                                                                                                                                                                                                   | Diagnostic                                                                                                                                                                                                                                                                                                                                                                                                                     | Screening                                                                                                                                                                                                                                                                                                                                                                                                                                              |
| <b>What it detects</b>              | <ul style="list-style-type: none"> <li>Down syndrome</li> <li>Trisomy 18</li> <li>Neural tube defects (e.g. spina bifida)</li> <li>Possible pregnancy complications</li> </ul>                                                                                                                                                                                                                                                                                                                                                                              | <ul style="list-style-type: none"> <li>Down syndrome</li> <li>Trisomy 13</li> <li>Trisomy 18</li> <li>Other chromosome anomalies</li> <li>Neural tube defects (e.g. spina bifida)</li> <li>Sex of the baby</li> </ul>                                                                                                                                                                                                          | <ul style="list-style-type: none"> <li>Down syndrome</li> <li>Trisomy 13</li> <li>Trisomy 18</li> <li>Sex of the baby</li> </ul>                                                                                                                                                                                                                                                                                                                       |
| <b>Possible outcome</b>             | <ul style="list-style-type: none"> <li>The test can predict that the pregnancy is at:                             <ul style="list-style-type: none"> <li>→ <b>Low risk</b> for DS (less than 1/200 – 1/300) so no further test is recommended</li> <li>→ <b>High risk</b> for DS (higher than 1/200 – 1/300)                                     <ul style="list-style-type: none"> <li>• <b>Amniocentesis</b> is offered to check if the baby actually has DS or other abnormalities detectable by chromosome analysis.</li> </ul> </li> </ul> </li> </ul> | <ul style="list-style-type: none"> <li><b>Normal result:</b> the baby does not have DS and has normal chromosomes.</li> <li><b>Abnormal result:</b> the baby has DS or has another significant chromosome abnormality. In this case, the parents can choose to:                             <ul style="list-style-type: none"> <li>→ <b>continue the pregnancy</b></li> <li>→ <b>stop the pregnancy</b></li> </ul> </li> </ul> | <ul style="list-style-type: none"> <li>The test can predict that the pregnancy is at:                             <ul style="list-style-type: none"> <li>→ <b>Very low risk</b> for DS - so no further test is recommended</li> <li>→ <b>Very high risk</b> for DS                                     <ul style="list-style-type: none"> <li>• <b>Amniocentesis is recommended</b> to confirm that the baby has DS</li> </ul> </li> </ul> </li> </ul> |

Note: NIPT is not yet considered as a first-tier screening test (i.e. that could replace serum screening); the current available evidence supports its use as a second tier screening test – after a positive serum screening and before an amniocentesis.

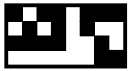

21746

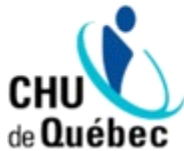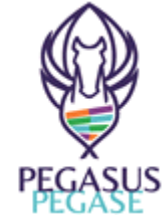

4. Information about a baby having Down syndrome (DS) can have different uses for different people. Why are you interested in knowing whether your baby has DS?

(PLEASE CHECK ONE ANSWER)

- I want to know in advance to prepare for the birth of a baby with DS if the baby is diagnosed with DS
- I would consider terminating the pregnancy if the baby was diagnosed with DS
- I'm unsure
- I don't want to know but my partner does

**Other:**

**PART 2: INFORMED CONSENT**

5. When would be the **best** time for you to receive the following information:

(PLEASE CHECK ONE ANSWER PER STATEMENT)

|           |                                                                                                                    | Early prenatal appointment ahead of time of NIPT | Same day as blood test for NIPT | When you get NIPT results | Not interested in this information |
|-----------|--------------------------------------------------------------------------------------------------------------------|--------------------------------------------------|---------------------------------|---------------------------|------------------------------------|
| <b>a.</b> | What is Down syndrome (DS)                                                                                         | <input type="checkbox"/>                         | <input type="checkbox"/>        | <input type="checkbox"/>  | <input type="checkbox"/>           |
| <b>b.</b> | How good is NIPT in detecting DS                                                                                   | <input type="checkbox"/>                         | <input type="checkbox"/>        | <input type="checkbox"/>  | <input type="checkbox"/>           |
| <b>c.</b> | What the test can and cannot tell                                                                                  | <input type="checkbox"/>                         | <input type="checkbox"/>        | <input type="checkbox"/>  | <input type="checkbox"/>           |
| <b>d.</b> | What is the chance that you can have a baby with DS (according to family history, age, previous pregnancy history) | <input type="checkbox"/>                         | <input type="checkbox"/>        | <input type="checkbox"/>  | <input type="checkbox"/>           |
| <b>e.</b> | What are the possible results (high vs. low risk for DS)                                                           | <input type="checkbox"/>                         | <input type="checkbox"/>        | <input type="checkbox"/>  | <input type="checkbox"/>           |
| <b>f.</b> | What are my options if the result is positive                                                                      | <input type="checkbox"/>                         | <input type="checkbox"/>        | <input type="checkbox"/>  | <input type="checkbox"/>           |
| <b>g.</b> | What are the available resources for families who have children with DS                                            | <input type="checkbox"/>                         | <input type="checkbox"/>        | <input type="checkbox"/>  | <input type="checkbox"/>           |

**Other:**

6. Do you think it is important to get written consent for NIPT considering there is no risk of miscarriage?

(PLEASE CHECK ONE ANSWER ONLY)

- Yes
- No
- I don't know
- Other: \_\_\_\_\_

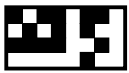

21746

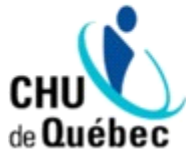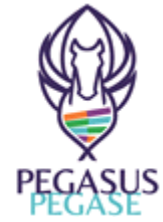

7. Please rank in order of importance the people you would like to discuss NIPT with:  
(1 = YOUR FIRST CHOICE, 5/6 = YOUR LAST CHOICE)

- Family physician
- Obstetrician/Gynecologist
- Genetics specialist
- Nurse
- Midwife
- Other: \_\_\_\_\_

8. How would you like to be informed about NIPT?  
(PLEASE CHECK ALL THAT APPLY)

- Brochures
- Video
- Discussion with prenatal caregiver
- Website
- Group meetings
- Other: \_\_\_\_\_

9. How much time would you want to make a decision about NIPT?  
(PLEASE CHECK ONE ANSWER ONLY)

- I would make a decision during the appointment when I'm offered the test.
- I would want a few days to think about it.
- Other: \_\_\_\_\_

10. What would be the most appropriate way for you to receive the results of NIPT?  
(PLEASE CHECK ONE ANSWER FOR EACH STATEMENT)

|    |                                   | In person                | By phone                 | By mail, fax or email    | Through a secured website | I don't mind             |
|----|-----------------------------------|--------------------------|--------------------------|--------------------------|---------------------------|--------------------------|
| a. | If NIPT result is LOW risk of DS  | <input type="checkbox"/> | <input type="checkbox"/> | <input type="checkbox"/> | <input type="checkbox"/>  | <input type="checkbox"/> |
| b. | If NIPT result is HIGH risk of DS | <input type="checkbox"/> | <input type="checkbox"/> | <input type="checkbox"/> | <input type="checkbox"/>  | <input type="checkbox"/> |

Other: \_\_\_\_\_

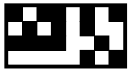

21746

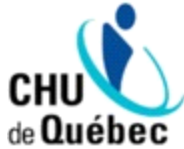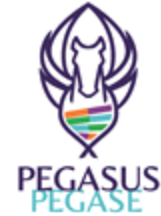

### **PART 3: HOW SHOULD NIPT BE USED?**

**11.** Melissa is 40 years old and is 10 weeks pregnant. She is meeting her doctor for her first prenatal visit. During her visit, the doctor explains that:

- *Current screening* can assess the risk that the baby might have Down syndrome (DS). It can also tell her the risk of neural tube defects (such as spina bifida) and give her information about the risk of complications during pregnancy and labor. However, current screening detects only about 80% of cases of DS and Melissa will only get her results after the 15<sup>th</sup> week of pregnancy.
- *NIPT* is available earlier in the pregnancy (around 10 weeks) and will detect 99% of cases of DS. NIPT can also predict the risk that the baby might have a sex chromosome disorder (where the baby has an extra or missing sex chromosome). However, it cannot tell whether the baby might have a neural tube defect or about the risk of pregnancy and labour complications.

**11.1.** If you were Melissa and you had to choose between current screening and NIPT as a first step, which test would you choose for the pregnancy?

**(PLEASE CHECK ONE ANSWER ONLY)**

- Current screening
- NIPT
- I would not want any testing (please skip the next question and go to question 12)

**11.2.** How did the following reasons influence your decision?

**(PLEASE CIRCLE ONE ANSWER FOR EACH STATEMENT)**

|           |                                                                                                     | Did not influence |   | Somewhat influenced |   | Strongly influenced |  |
|-----------|-----------------------------------------------------------------------------------------------------|-------------------|---|---------------------|---|---------------------|--|
| <b>a.</b> | Current screening estimates the risk that the baby has neural tube defects and NIPT doesn't         | 1                 | 2 | 3                   | 4 | 5                   |  |
| <b>b.</b> | Current screening can indicate the possibility of pregnancy and labor complications and NIPT cannot | 1                 | 2 | 3                   | 4 | 5                   |  |
| <b>c.</b> | NIPT is much more accurate than current screening in assessing the risk of DS                       | 1                 | 2 | 3                   | 4 | 5                   |  |
| <b>d.</b> | Results of NIPT can be available earlier in the pregnancy than the result of current screening      | 1                 | 2 | 3                   | 4 | 5                   |  |

**Other:**

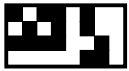

21746

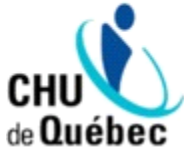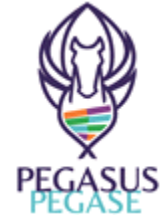

12. Carolyn is 40 years old and is 16 weeks pregnant. She is meeting her doctor for a prenatal visit. Her pregnancy is at high risk for Down syndrome (meaning that there is more than 1 in 300 chance that her baby has DS) based on current screening.

She is referred to a genetic specialist, who explains that there are further tests available:

- *Amniocentesis* is an invasive procedure that is available from the 15<sup>th</sup> week of pregnancy. Because a needle would be inserted into Carolyn's womb, there is an increased risk of miscarriage due to the procedure (0.25 to 0.5%). This test is practically 100% accurate, and makes it possible to check the number of all of the baby's chromosomes.
- *NIPT* is done earlier in the pregnancy (about 10 weeks). Because it only requires a blood draw, there is no increased risk of miscarriage. However, NIPT cannot check all of the baby's chromosomes. NIPT is a very accurate test (will detect about 99% of cases of DS), but is not as accurate as amniocentesis.

12.1. If you were Carolyn and you had to choose between amniocentesis and NIPT as a diagnostic test after current screening, which test would you choose?

(PLEASE CHECK ONE ANSWER ONLY)

- Amniocentesis
- NIPT
- I would not want any testing (please skip the next question and go to question 13)

12.2. If you chose testing, how did the following reasons influence your decision?

(PLEASE CIRCLE ONE ANSWER FOR EACH STATEMENT)

|    |                                                                                       | Did not influence |   | Somewhat influenced |   | Strongly influenced |
|----|---------------------------------------------------------------------------------------|-------------------|---|---------------------|---|---------------------|
| a. | Amniocentesis is more accurate than NIPT                                              | 1                 | 2 | 3                   | 4 | 5                   |
| b. | Amniocentesis gives more information about possible chromosome anomalies than NIPT    | 1                 | 2 | 3                   | 4 | 5                   |
| c. | With NIPT there is no increased risk of miscarriage                                   | 1                 | 2 | 3                   | 4 | 5                   |
| d. | NIPT tests for the common chromosome disorders (like DS), which is all I need to know | 1                 | 2 | 3                   | 4 | 5                   |
| e. | NIPT is more convenient than amniocentesis. (only requires a blood draw)              | 1                 | 2 | 3                   | 4 | 5                   |

Other:

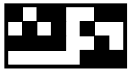

21746

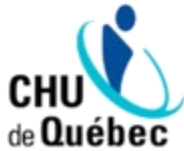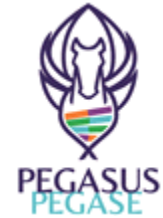

**13.** Right now, NIPT is not covered by the health care system in most provinces and territories. How much would you be willing to pay for NIPT?  
**(PLEASE CHECK ONE ANSWER ONLY)**

- 0\$                       100\$ to 499\$                       1000\$ to 4999\$  
 1\$ to 99\$                       500\$ to 999\$                       More than 5000\$

**14.** Who do you think should have access to NIPT free of charge?  
**(PLEASE CHECK ONE ANSWER ONLY)**

- All women                       Low risk women only                       Other: \_\_\_\_\_  
 High risk women only                       Nobody (you should pay for the test)

**15.** If NIPT were free of charge, how do you think that would impact your decision to have the test?  
**(PLEASE CIRCLE ONE ANSWER)**

| No impact |   | Some impact |   | A lot of impact |
|-----------|---|-------------|---|-----------------|
| 1         | 2 | 3           | 4 | 5               |

**PART 4: DECISION MAKING AND THE INVOLVEMENT OF OTHERS**

**16.** Please rank in order of importance the input of the following people regarding your decision to choose NIPT:  
**(1 = THE MOST IMPORTANT; 5/6 = THE LEAST IMPORTANT)**

- Partner  
 Family  
 Friends and colleagues  
 Your own prenatal care professional  
 A specialist (medical geneticist, obstetrician)  
 Other: \_\_\_\_\_



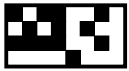

21746

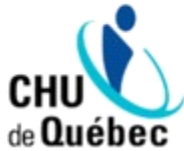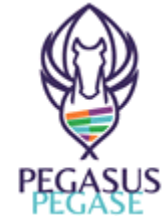

17. How much input do you feel a health professional should have regarding a woman's decision about the following tests?  
**(PLEASE CIRCLE ONE ANSWER FOR EACH STATEMENT)**

|    |                   | No input |   | Some input |   | A lot of input |
|----|-------------------|----------|---|------------|---|----------------|
| a. | Current screening | 1        | 2 | 3          | 4 | 5              |
| b. | Amniocentesis     | 1        | 2 | 3          | 4 | 5              |
| c. | NIPT              | 1        | 2 | 3          | 4 | 5              |

18. How much input do you feel a partner should have regarding a woman's decision about the following tests?  
**(PLEASE CIRCLE ONE ANSWER FOR EACH STATEMENT)**

|    |                   | No input |   | Some input |   | A lot of input |
|----|-------------------|----------|---|------------|---|----------------|
| a. | Current screening | 1        | 2 | 3          | 4 | 5              |
| b. | Amniocentesis     | 1        | 2 | 3          | 4 | 5              |
| c. | NIPT              | 1        | 2 | 3          | 4 | 5              |

19. If your partner disagreed with your decision to do or not NIPT, what impact would that have on your decision?  
**(PLEASE CIRCLE ONE ANSWER ONLY)**

| No impact |   | Some impact | A big impact |   |
|-----------|---|-------------|--------------|---|
| 1         | 2 | 3           | 4            | 5 |

**Any other comments on the impact a disagreement would have on your decision:**

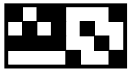

21746

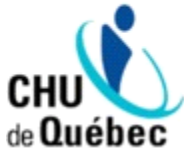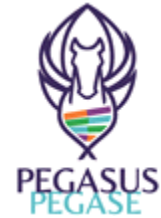**PART 5: SOCIAL IMPACT OF NIPT**

20. Provincial health care systems cover routine prenatal care. Right now, NIPT is not part of routine prenatal care in most provinces and territories. If NIPT were covered as part of routine prenatal care, which of the following outcomes would be of concern to you?

(PLEASE CIRCLE ONE ANSWER FOR EACH STATEMENT)

|    |                                                                                                     | Not concerned |   | Somewhat concerned |   | Very concerned |  |
|----|-----------------------------------------------------------------------------------------------------|---------------|---|--------------------|---|----------------|--|
| a. | Increased pressure on women to use NIPT                                                             | 1             | 2 | 3                  | 4 | 5              |  |
| b. | Increased use of NIPT leading to increased pressure to terminate if the baby has Down syndrome (DS) | 1             | 2 | 3                  | 4 | 5              |  |
| c. | Increased availability of NIPT making people less willing to accept children with disabilities      | 1             | 2 | 3                  | 4 | 5              |  |
| d. | Decrease of the population of people with DS                                                        | 1             | 2 | 3                  | 4 | 5              |  |
| e. | Reduction in resources available for people with DS and their families                              | 1             | 2 | 3                  | 4 | 5              |  |
| f. | Negative impact on individuals with DS and their families (stigma, discrimination)                  | 1             | 2 | 3                  | 4 | 5              |  |

Other:

21. If NIPT became part of routine tests offered during the pregnancy, would you feel pressured to take the test?

(PLEASE CIRCLE ONE ANSWER ONLY)

| No pressure |   | Some pressure |   |   | A lot of pressure |  |
|-------------|---|---------------|---|---|-------------------|--|
| 1           | 2 | 3             | 4 | 5 |                   |  |

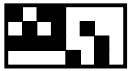

21746

**PART 6: FUTURE USES OF NIPT**

22. In the future, NIPT may be able to test for many genetic conditions. How interested would you be in NIPT for the following conditions:

(PLEASE CIRCLE ONE ANSWER FOR EACH STATEMENT)

|    |                                                                                                | Not interested |   | Somewhat interested |   | Very interested |  |
|----|------------------------------------------------------------------------------------------------|----------------|---|---------------------|---|-----------------|--|
| a. | Inherited disorders (such as Tay-Sachs, cystic fibrosis, sickle cell disease, Gaucher disease) | 1              | 2 | 3                   | 4 | 5               |  |
| b. | Paternity testing                                                                              | 1              | 2 | 3                   | 4 | 5               |  |
| c. | Physical and behavioural attributes (eye colour, intelligence, sexual orientation)             | 1              | 2 | 3                   | 4 | 5               |  |
| d. | Predisposition to childhood-onset diseases (autism, leukemia)                                  | 1              | 2 | 3                   | 4 | 5               |  |
| e. | Predisposition to late-onset diseases (heart problems, Alzheimer's disease, cancer)            | 1              | 2 | 3                   | 4 | 5               |  |
| f. | Predisposition to mental disorders (schizophrenia, bipolar disease)                            | 1              | 2 | 3                   | 4 | 5               |  |

Other:

**PART 7: ABOUT YOURSELF**

MM/AAAA

23. Your birth date (Month/Year):

|   |   |   |   |   |   |   |
|---|---|---|---|---|---|---|
| □ | □ | / | □ | □ | □ | □ |
|---|---|---|---|---|---|---|

24. Your country of birth: \_\_\_\_\_

25. What language do you mostly speak **at home**?

English

French

Other: \_\_\_\_\_

26. In which province or territory do you **currently live**?

(PLEASE CHECK ONE ANSWER ONLY)

Alberta

New Brunswick

Northwest Territories

Ontario

Saskatchewan

British Columbia

Newfoundland and Labrador

Nunavik

Prince-Edward-Island

Yukon

Manitoba

Nova Scotia

Nunavut

Quebec

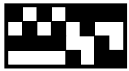

21746

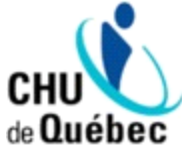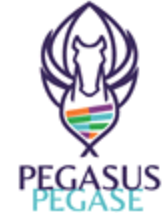

27. What is your race/ethnicity?  
(PLEASE CHECK ALL THAT APPLY)

- Caucasian/white
- African descent
- North American Aboriginal (First Nation, Inuit, Metis)
- Latin American
- Middle Eastern
- Other: \_\_\_\_\_
- Asian

28. What is your religious/cultural background?  
(PLEASE CHECK ALL THAT APPLY)

- Buddhist
- Christian
- Muslim
- No religious affiliation
- Catholic
- Jewish
- Protestant
- Other: \_\_\_\_\_
- Catholic Orthodox
- Hindu
- Sikh

29. How important is religion / spirituality in your life?  
(PLEASE CIRCLE ONE ANSWER ONLY)

| Not important |   | Somewhat important |   | Very Important |   |
|---------------|---|--------------------|---|----------------|---|
| 1             | 2 | 3                  | 4 | 5              | 5 |

30. What is the highest level of school you *completed*?  
(PLEASE CHECK ONE ANSWER ONLY)

- Elementary school
- High school
- University
- Trades/Apprenticeship
- College
- Other : \_\_\_\_\_

31. Are you a healthcare professional?  
(PLEASE CHECK ONE ANSWER ONLY)

- Yes → **31.1.** If yes, what profession?  
\_\_\_\_\_
- No

32. What is your relationship status?  
(PLEASE CHECK ONE ANSWER ONLY)

- Married
- Single
- Widowed
- Common Law
- Divorced/separated
- Other : \_\_\_\_\_

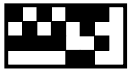

21746

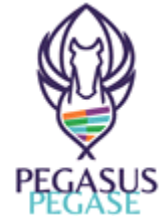

33. Do you have children?

**(PLEASE CHECK ONE ANSWER ONLY)**

Yes  No

34. Do you have a child with Down syndrome?

**(PLEASE CHECK ONE ANSWER ONLY)**

Yes  No

35. Do you have a child with a physical or intellectual disability?

**(PLEASE CHECK ONE ANSWER ONLY)**

Yes  No

36. Does anyone close to you have a child with Down syndrome?

**(PLEASE CHECK ONE ANSWER ONLY)**

Yes  No

37. For this pregnancy, are you considered:

**(PLEASE CHECK ONE ANSWER ONLY)**

Low/average risk for Down syndrome  High risk for Down syndrome  Unsure

38. For this pregnancy, who provided you information about current screening, amniocentesis and/or NIPT?

**(PLEASE CHECK ALL THAT APPLY)**

Family physician  Genetic counsellor  Midwife  
 Obstetrician/Gynecologist  Nurse  Other: \_\_\_\_\_  
 Medical geneticist

39. This pregnancy was conceived:

**(PLEASE CHECK ONE ANSWER ONLY)**

Naturally  with assisted reproductive technology (ART), other than IVF  
 by *in vitro* fertilization (IVF)  Other : \_\_\_\_\_

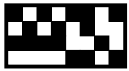

21746

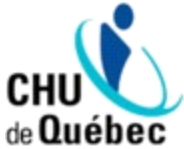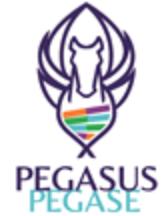

40. Have you had **prenatal screening** in a **previous pregnancy**?  
(PLEASE CHECK ONE ANSWER ONLY)

- Yes → **If yes, what was the result of the prenatal screening?**  
(PLEASE CHECK ONE ANSWER ONLY)
- No                       High risk for Trisomy (e.g. Down Syndrome, trisomy 13, trisomy 18)
- Unsure                    High risk for a Neural Tube Defect (e.g. spina bifida)
- Low or average risk
- Unsure

41. Have you had **prenatal diagnosis** (chorionic villus sampling or amniocentesis) in a **previous pregnancy**?  
(PLEASE CHECK ONE ANSWER ONLY)

- Yes → **If yes, what was the result of the prenatal diagnosis?**  
(PLEASE CHECK ONE ANSWER ONLY)
- No                       Diagnosis of a genetic condition (e.g. cystic fibrosis, Down syndrome)
- Unsure                 Normal result (no genetic condition detected)
- Other: \_\_\_\_\_
